# Supplementary material for: Clinical, Molecular, and Functional Characterization of CLCN1 Mutations in Three Families with Recessive Myotonia Congenita
Source: PubMed Central journal article supplement (PMC4534513; doi:10.1007/s12017-015-8356-8), 2015-05-26
Supplement: 12017_2015_8356_MOESM1_ESM.pdf [file 12017_2015_8356_MOESM1_ESM.pdf]

Online Resource 1. NeuroMol Med

Portaro S, Altamura C, Licata N, Camerino GM, Imbrici P, Musumeci O, Rodolico C, Conte Camerino D, Toscano A, & Desaphy J-F. Clinical, molecular and functional characterization of CLCN1 mutations in three families with recessive Myotonia Congenita.

*University of Bari Aldo Moro, Bari, Italy. E-mail: [jeanfrancois.desaphy@uniba.it](mailto:jeanfrancois.desaphy@uniba.it)*

*University of Messina, Messina, Italy. E-mail: [atoscano@unime.it](mailto:atoscano@unime.it)*

List of genes quantified by real-time PCR with relative Life Technologies assay IDs.

| Gene name     | Protein name                                                            | Assay IDs     |
|---------------|-------------------------------------------------------------------------|---------------|
| <i>CLCN1</i>  | ClC-1 voltage-sensitive chloride channel                                | Hs00892505_m1 |
| <i>SCN4A</i>  | Nav1.4 voltage-gated sodium channel $\alpha$ subunit                    | Hs01109480_m1 |
| <i>SCN1B</i>  | Voltage-gated sodium channel auxiliary $\beta$ 1 subunit                | Hs03987893_m1 |
| <i>KCNMA1</i> | Large conductance $Ca^{2+}$ -activated $K^{+}$ channel $\alpha$ subunit | Hs01119498_m1 |
| <i>KCNC4</i>  | Kv3.4 voltage-gated $K^{+}$ channel $\alpha$ -subunit                   | Hs00428198_m1 |
| <i>KCNE3</i>  | MinK-Related Peptide 2 (MiRP2)                                          | Hs00538801_m1 |
| <i>KCNJ2</i>  | Kir2.1 inwardly-rectifying $K^{+}$ channel                              | Hs00265315_m1 |
| <i>KCNJ18</i> | Kir2.6 inwardly-rectifying $K^{+}$ channel                              | Hs00253248_s1 |
| <i>KCNJ11</i> | Kir6.2 inwardly-rectifying $K^{+}$ channel                              | Hs00265026_s1 |
| <i>ABCC9</i>  | SUR2A ATP-binding cassette                                              | Hs01072316_m1 |
| <i>HPRT1</i>  | hypoxanthine phosphoribosyltransferase 1                                | Hs02800695_m1 |
| <i>ACTB</i>   | $\beta$ -actin                                                          | Hs99999903_m1 |
| <i>B2M</i>    | $\beta$ 2-microglobulin                                                 | Hs00984230_m1 |

## Online Resource 2. NeuroMol Med

Portaro S, Altamura C, Licata N, Camerino GM, Imbrici P, Musumeci O, Rodolico C, Conte Camerino D, Toscano A, & Desaphy J-F. Clinical, molecular and functional characterization of CLCN1 mutations in three families with recessive Myotonia Congenita.

University of Bari Aldo Moro, Bari, Italy. E-mail: [jeanfrancois.desaphy@uniba.it](mailto:jeanfrancois.desaphy@uniba.it)

University of Messina, Messina, Italy. E-mail: [atoscano@unime.it](mailto:atoscano@unime.it)

## Amino acid alignment of CLC proteins with Clustal 2.2

### Species-specific ClC-1:

```
Human (T82) IYGHHKEQFSDREQDIGMPKKTG-----SSSTVDSKDEDHYSKCQDCIH 104
Rat (T82) IYGHHKEQYSYQAQDRGIPKKT-----SSSTVDSLDEDHYSKCQDCVH 104
Mouse (M82) IYGHQKEQYSYKAQDGGMPKMG-----SSSTMDSLDEDHYSKCQDCVH 104
Dog (M12) -----DKEQDTGMSKMG-----SSESMDSKDEDHYSKCQGCVR 34
```

### Human CLC members:

```
ClC-2 (R56) IR-----LGGPEPWKGPSSRA-----APELLEYG-RSRCARCRVCSV 77
ClC-Ka (F11) -----MEELVGLREGFS-----GDPVTLQELWGPCPHIRRAIQ 33
ClC-Kb (S11) -----MEEFVGLREGSS-----GNPVTLQELWGPCPRIIRRGIR 33
ClC-3 (V82) NGGSINSSTHLLDLLDEPIPGVG-----TYDDFHTIDWVREKCKDRERHRRINSKKK 112
ClC-4 (V24) NAGAMSGSGNLMDFLDEPFDPVG-----TYEDFHTIDWLREKSRDTRHRKITSKSK 54
ClC-5 (V11) -----MDFLEEPIPGVG-----TYDDFNTIDWVREKSRDRDRHREITNKS 41
ClC-6 (X) -----ETQEEDEILP-----RKDYESLDYDRICINDPYLEV 64
ClC-7 (D72) SALFRVGHMSSVELDDELLDPDMDPPHPFKEIPHNEKLLSLKYESLDYDENSENQLFLEE 110
```

### Species-specific ClC-1:

```
Human (G270) ICAAVLSKFMSVFCG-----VYEQPYYSIDILTVGCAVGVGCCFGTPLGGVLFSEI 293
Rat (G270) ICAAVLSKFMSMFCG-----VYEQPYYYTDILTVGCAVGVGCCFGTPLGGVLFSEI 293
Mouse (G270) ICAAVLSKFMSMFCG-----VYEQPYYYTDILTVGCAVGVGCCFGTPLGGVLFSEI 293
Dog (G200) ICAAVLSKFMSMFCG-----VYEQPYYYTDMLTVGCAVGVGCCFGTPLGGVLFSEI 223
```

### Human CLC members:

```
ClC-2 (A243) MCAALLSKFLSLFGG-----IYENESRNTEMLAAACAVGVGCCFAAPIGGVLFSEI 266
ClC-Ka (A204) MIAAYLGRVRTTTIG-----EPENKSKQNEMLVAAAAGVATVFAAPFSGVLFSEI 227
ClC-Kb (A204) MMAAYLGRVRTTTIG-----EPENKSKQNEMLVAAAAGVATVFAAPFSGVLFSEI 227
ClC-3 (A317) CCGNIFSYLFPK-----YSTNEAKKREVLSAASAAGVSVAFGAPIGGVLFSEI 340
ClC-4 (A259) CCGNFFSLSFSK-----YSKNEGKRREVLSAAAAAGVSVAFGAPIGGVLFSEI 282
ClC-5 (A246) CCGNILCHCFNK-----YRKNEAKRREVLSAAAAAGVSVAFGAPIGGVLFSEI 269
ClC-6 (G245) VVGAGLPQFQSI SLRKIQFNFPYFRSDRDKRDFVSAGAAAGVAAAFGAPIGGTLFSEI 268
ClC-7 (G292) VIAAGISQGRSTSLKRDFKIFEYFRDTEKRDVVSAGAAAGVSAAFGAPVGGVLFSEI 315
```

### Species-specific ClC-1:

```
Human (R453) LGQSAVWIHPVNVNVI I I LFFVMKFWMSIVATTMPIPCGGFMPVFLGAAFGRVGEI 502
Rat (Q453) LGQSAVWIHPVNVNVI I I LFFVMKFWMSIVATTMPIPCGGFMPVFLGAAFGRVGEI 502
Mouse (Q453) LGQSAVWLHPVNVNVI I I LFFVMKFWMSIVATTMPIPCGGFMPVFLGAAFGRVGEI 502
Dog (R383) LGRSAVWIHPVNVNVI I I LFFIMKFWMSIVATTMPIPCGGFMPVFLGAAFGRVGEI 432
```

### Human CLC members:

```
ClC-2 (R428) PSTSQAWNPPRANVFLTLVIFILMKFWMSALATTIPVPCGAFMPVFLGAAFGRVGEI 477
ClC-Ka (R395) QHLWWEWYHPRFTIFGTALFFLVKFWMLILATTIPMPAGYFMPFIIFILGAAIGRLLGEAL 444
ClC-Kb (R395) QHLWWEWYHPRFTIFGTALFFLVKFWMLILATTIPMPAGYFMPFIIFVYGAIGRLLFGETL 444
ClC-3 (X) PAGIGVYSA-----IWQLCLALIFKIIMTVFTFGIKVPSGLFIPSMAGAIAGRIVGIAV 545
ClC-4 (X) PAGVGVYTA-----MWQLALALIFKIVVTIFTFGMKIPSGLFIPSMAGAIAGRIVGIGV 487
ClC-5 (X) PAGVGVYSA-----MWQLALTLILKIVITIFTFGMKIPSGLFIPSMAGAIAGRLLGVGM 473
ClC-6 (G458) AILQLFHQD-GTFSPVTLALFFVLYFLLACWTYGISVPSGLFVPSLLCGAAFGRLVAN-- 505
ClC-7 (G483) SVVSLFHDPPGSYNPLTLGLFTLVYFFLACWTYGLTVSAGVFIPSLLLIGAAWGRVLF-- 529
```

Online Resource 3. NeuroMol Med

Portaro S, Altamura C, Licata N, Camerino GM, Imbrici P, Musumeci O, Rodolico C, Conte Camerino D, Toscano A, & Desaphy J-F. Clinical, molecular and functional characterization of CLCN1 mutations in three families with recessive Myotonia Congenita.

University of Bari Aldo Moro, Bari, Italy. E-mail: [jeanfrancois.desaphy@uniba.it](mailto:jeanfrancois.desaphy@uniba.it)

University of Messina, Messina, Italy. E-mail: [atoscano@unime.it](mailto:atoscano@unime.it)

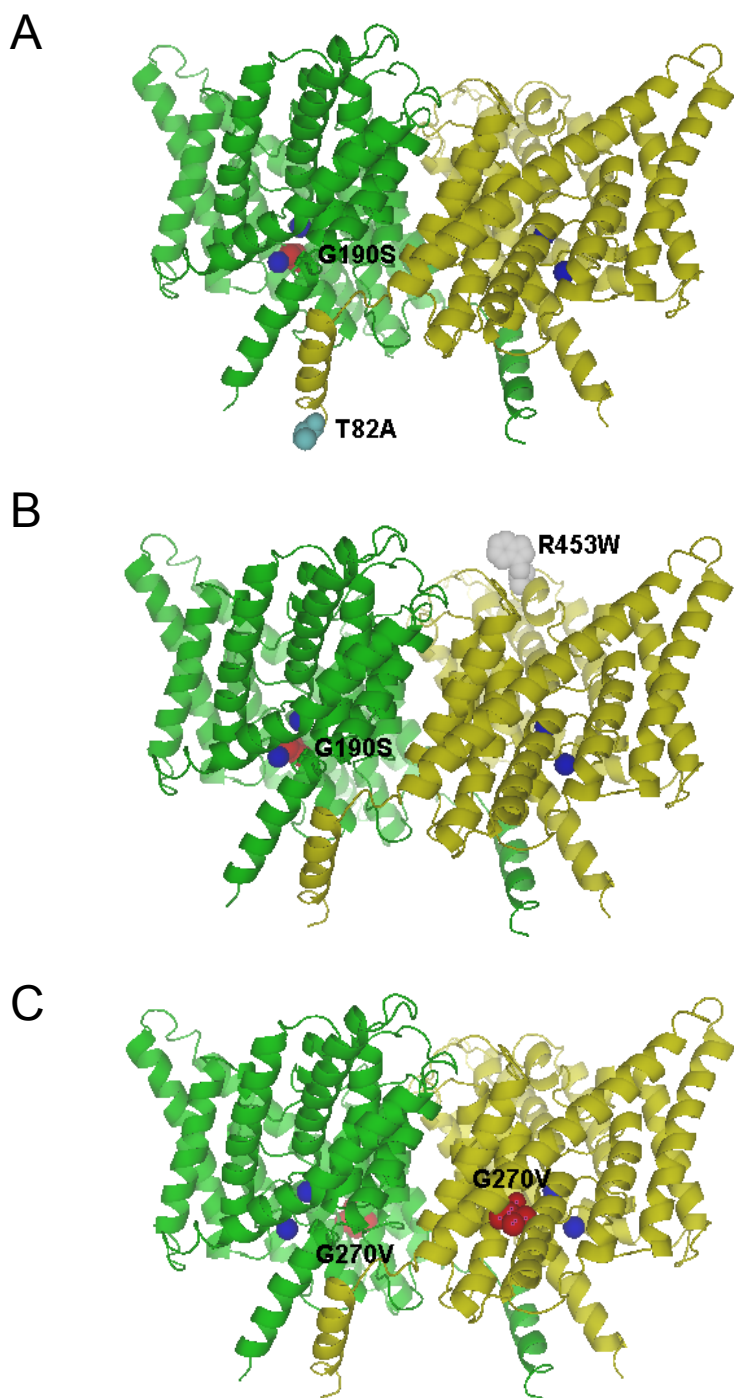

Three dimensional ribbon representation of the CLCN1 channel homodimer model based upon the structure of CLCN-ec1 viewed front the plane of the membrane. The two subunits are shown in green and yellow with Cl<sup>-</sup> ions (blue spheres) located in the pore of each subunit. Myotonic mutations are shown in heterozygosity for p.G190S (red) and p.T82A (cyan) (A), p.G190S and p.R453W (grey) (B), and homozygosity for p.G270V (red in C).

### Online Resource 3. NeuroMol Med

Portaro S, Altamura C, Licata N, Camerino GM, Imbrici P, Musumeci O, Rodolico C, Conte Camerino D, Toscano A, & Desaphy J-F. Clinical, molecular and functional characterization of CLCN1 mutations in three families with recessive Myotonia Congenita.

University of Bari Aldo Moro, Bari, Italy. E-mail: [jeanfrancois.desaphy@uniba.it](mailto:jeanfrancois.desaphy@uniba.it)

University of Messina, Messina, Italy. E-mail: [atoscano@unime.it](mailto:atoscano@unime.it)

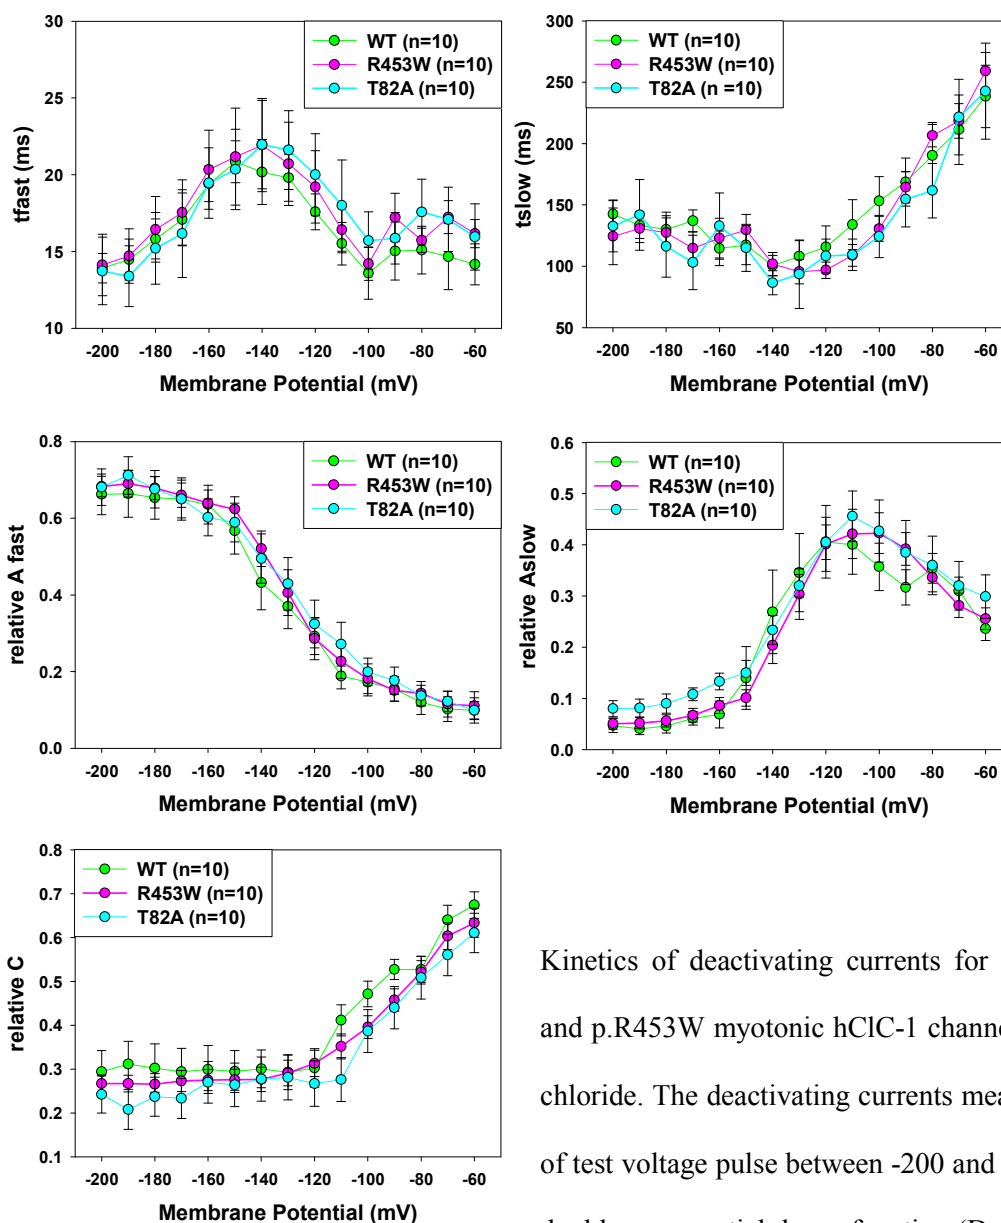

Kinetics of deactivating currents for wild-type and p.T82A and p.R453W myotonic hCIC-1 channels in high intracellular chloride. The deactivating currents measured at the beginning of test voltage pulse between -200 and -60 mV were fit with a double exponential decay function (Desaphy et al. 2013). The fit parameters include a fast time constant ( $\tau_{fast}$ , 10-ms range), a slow time constant ( $\tau_{slow}$ , 100-ms range), and their respective contribution to total current ( $A_{fast}$ ,  $A_{slow}$ ), plus the contribution of residual steady state current (relative C).

Online Resource 5. NeuroMol Med

Portaro S, Altamura C, Licata N, Camerino GM, Imbrici P, Musumeci O, Rodolico C, Conte Camerino D, Toscano A, & Desaphy J-F. Clinical, molecular and functional characterization of CLCN1 mutations in three families with recessive Myotonia Congenita.

University of Bari Aldo Moro, Bari, Italy. E-mail: [jeanfrancois.desaphy@uniba.it](mailto:jeanfrancois.desaphy@uniba.it)

University of Messina, Messina, Italy. E-mail: [atoscano@unime.it](mailto:atoscano@unime.it)

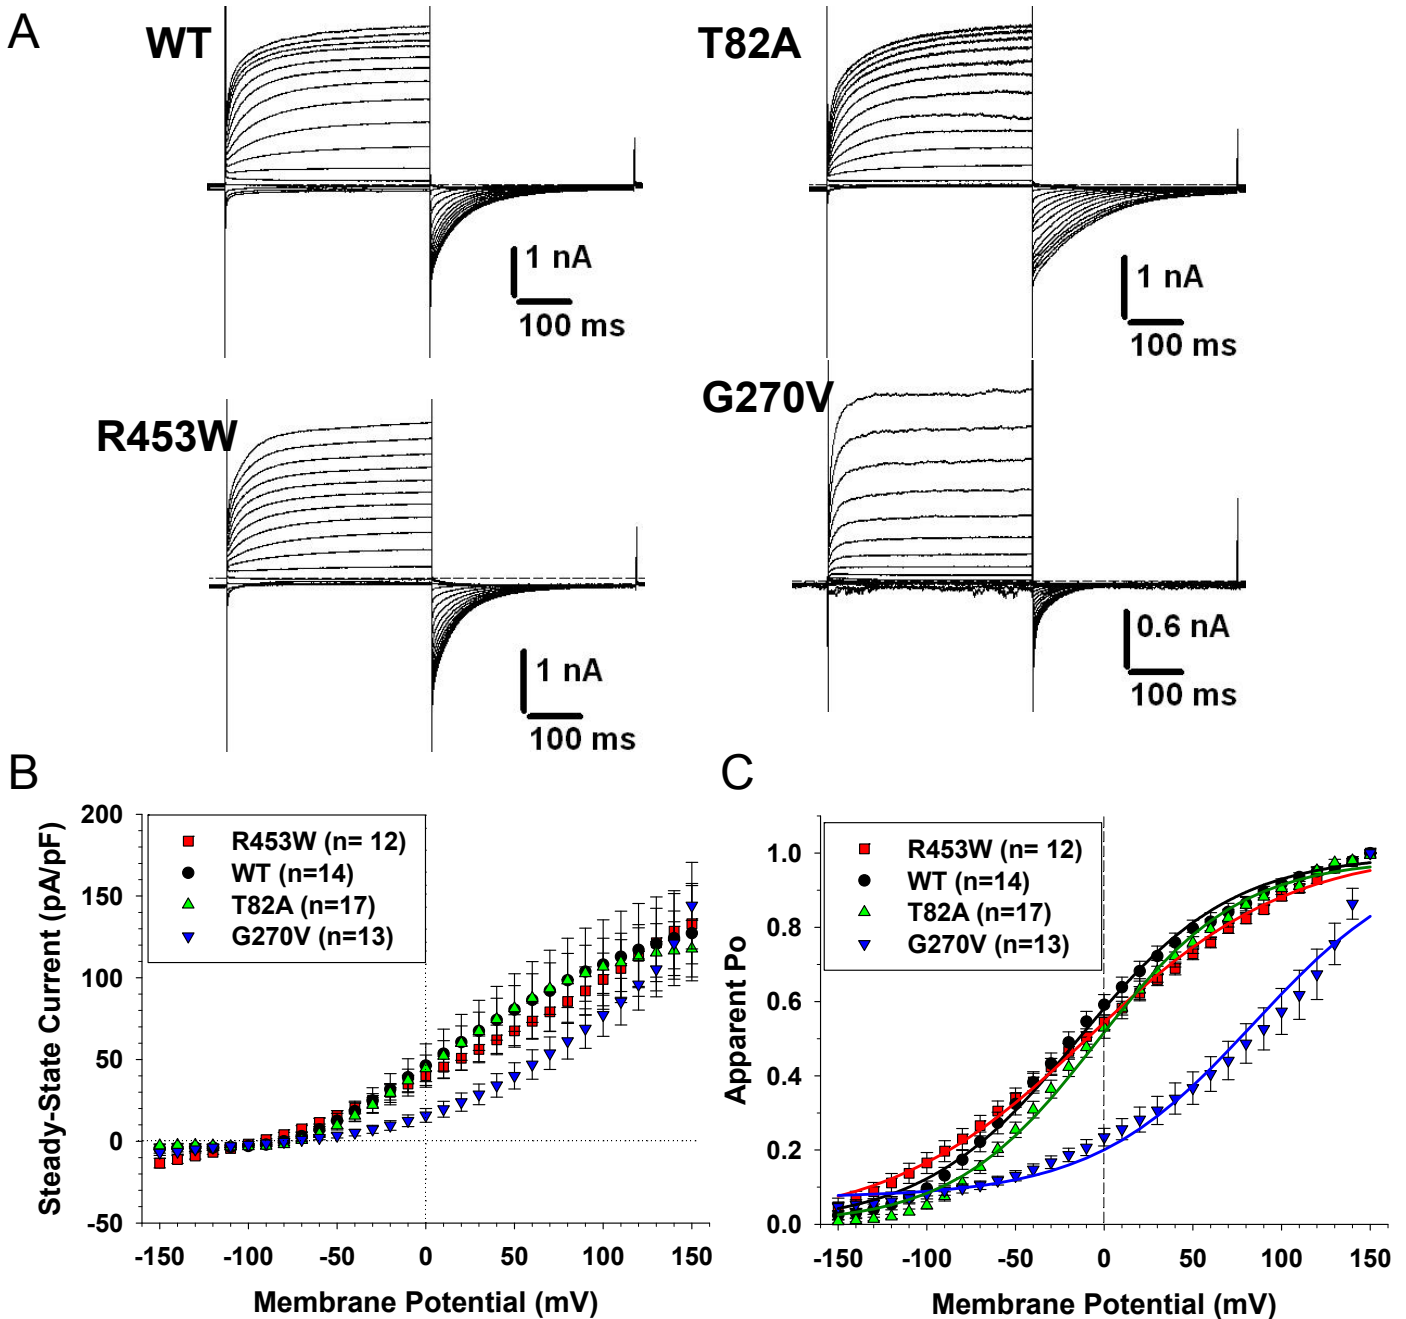

Chloride currents generated by wild-type hClC-1 channels and myotonic mutants in low intracellular chloride condition. **A**) Typical chloride currents recorded in HEK293 cells transfected with wild-type, p.T82A, p.R453W, and p.G270V hClC-1 variants. Cells were held at -95 mV and 400 ms voltage pulses were applied from -150 to +150 mV in 10-mV intervals every 3 seconds. For clarity only current traces obtained every 20 mV are shown. Chloride currents displayed similar kinetics, but p.G270V currents had reduced amplitude. **B**) The steady-state current density-voltage relationships show a reduced current density of p.G270V channels. **C**) The voltage dependence of activation were fit with a Boltzmann function (eq. 1). Fit parameters are reported in Table 1. Only p.G270V channels displayed a positively-shifted voltage dependence with respect to WT.

#### Online Resource 4. NeuroMol Med

Portaro S, Altamura C, Licata N, Camerino GM, Imbrici P, Musumeci O, Rodolico C, Conte Camerino D, Toscano A, & Desaphy J-F. Clinical, molecular and functional characterization of CLCN1 mutations in three families with recessive Myotonia Congenita.

University of Bari Aldo Moro, Bari, Italy. E-mail: [jeanfrancois.desaphy@uniba.it](mailto:jeanfrancois.desaphy@uniba.it)

University of Messina, Messina, Italy. E-mail: [atoscano@unime.it](mailto:atoscano@unime.it)

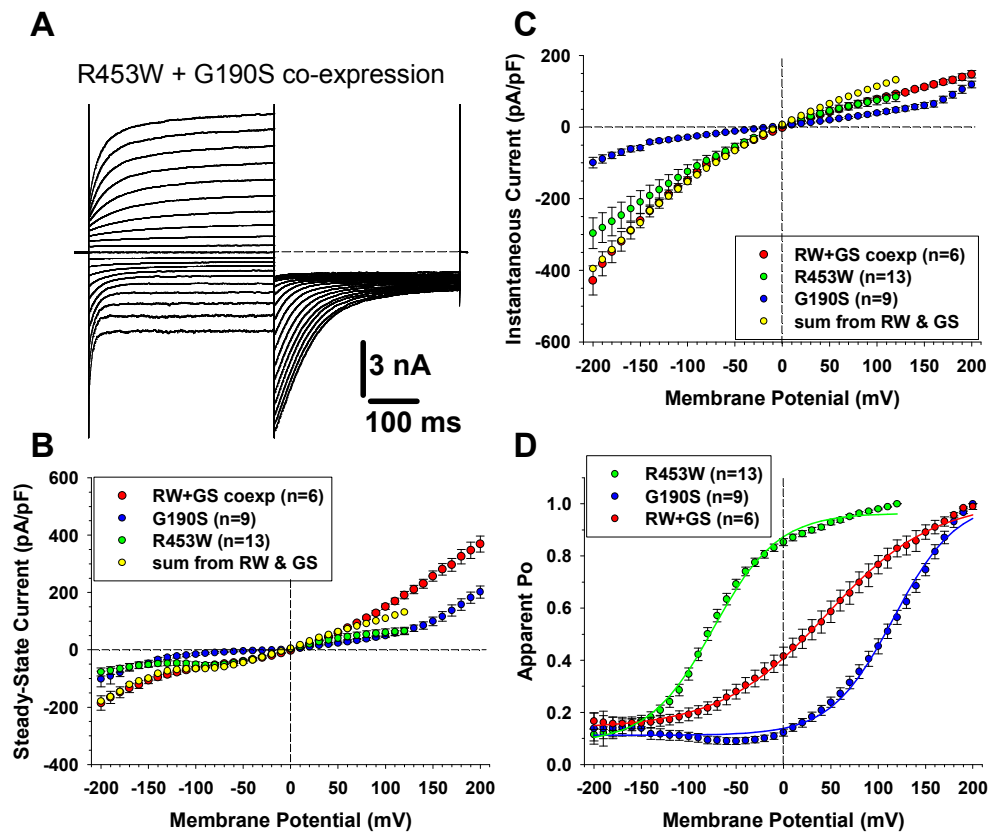

Chloride currents were recorded in tsA201 cells transfected with either p.G190S or p.R453W alone, or with both mutants together, using high intracellular chloride condition. (A) Family of chloride currents generated by cotransfected p.G190S and p.R453W mutants. The cell was held at 0 mV and voltage pulses were applied from -200 to +200 mV in 10-mV intervals every 3 seconds. For clarity only current traces obtained every 20 mV are shown. The mean I-V curves for instantaneous (B) and steady-state (C) currents are shown for p.R453W, p.G190S, and co-expressed p.G190S/p.R453W. In yellow are reported the algebraic sum of current densities calculated for p.G190S and p.R453W expressed alone. The yellow points are quite superimposed to the I-V relationship for co-expressed p.G190S + p.R453W. (D) The activation curves for co-expressed p.R453W + p.G190S is in between the relationships for p.G190S and p.R453W expressed alone. The Boltzmann fit parameters are reported in Table 1 of the manuscript.



Online Resource 5. NeuroMol Med

Portaro S, Altamura C, Licata N, Camerino GM, Imbrici P, Musumeci O, Rodolico C, Conte Camerino D, Toscano A, & Desaphy J-F. Clinical, molecular and functional characterization of CLCN1 mutations in three families with recessive Myotonia Congenita.

*University of Bari Aldo Moro, Bari, Italy. E-mail: [jeanfrancois.desaphy@uniba.it](mailto:jeanfrancois.desaphy@uniba.it)*

*University of Messina, Messina, Italy. E-mail: [atoscano@unime.it](mailto:atoscano@unime.it)*

Description of ion channels genes quantified by real-time PCR.

| Channel (gene)    | Channel (dys)function                                                                                                                                                                                                                                       | Some References                                                                                                 |
|-------------------|-------------------------------------------------------------------------------------------------------------------------------------------------------------------------------------------------------------------------------------------------------------|-----------------------------------------------------------------------------------------------------------------|
| CIC-1 (CLCN1)     | Voltage-sensitive chloride channel. Mutations cause Myotonia Congenita                                                                                                                                                                                      | Desaphy et al., <i>Exp Neurol</i> 248: 530-540, 2013                                                            |
| Nav1.4 (SCN4A)    | Skeletal muscle sodium channel $\alpha$ -subunit. Mutations cause Paramyotonia Congenita, Sodium Channel Myotonias, hyperkalemic Periodic Paralysis, hypokalemic Periodic Paralysis type 2.<br>Is the molecular target of the antimyotonic drug mexiletine. | Desaphy et al., <i>Neurology</i> 57: 1849-1857, 2001                                                            |
| $\beta$ 1 (SCN1B) | Nav1.4 auxiliary subunit. Mutations cause genetic epilepsy with febrile seizures plus (GEFS)+                                                                                                                                                               | Wallace et al., <i>Nat Genet</i> 19: 366-370, 1998; Brackenbury and Isom, <i>Front Pharmacol</i> 2: 53, 2011    |
| Slo1 (KCNMA1)     | Large conductance $Ca^{2+}$ -activated $K^+$ channel. Is one of the target for the antimyotonic drug acetazolamide                                                                                                                                          | Tricarico et al., <i>FASEB J</i> 18: 760-761, 2004.                                                             |
| Kv3.4 (KCNC4)     | Voltage-gated $K^+$ channel $\alpha$ -subunit. Contributes to action potential repolarization and resting potential                                                                                                                                         | Abbott et al., <i>Cell</i> 104: 217-231, 2001                                                                   |
| MiRP2 (KCNE3)     | voltage-gated $K^+$ channel auxiliary subunit. Contributes to resting potential                                                                                                                                                                             | Abbott et al., <i>Cell</i> 104: 217-231, 2001                                                                   |
| Kir2.1 (KCNJ2)    | Inwardly-rectifying $K^+$ channel. Mutations cause Andersen-Tawil syndrome including periodic paralysis                                                                                                                                                     | Tristani-Firouzi and Etheridge, <i>Pflugers Arch</i> 460: 289-294, 2010.                                        |
| Kir2.6 (KCNJ18)   | Inwardly-rectifying $K^+$ channel. Mutations may be linked to thyrotoxic and sporadic periodic paralysis, although this has been recently challenged                                                                                                        | Cheng et al., <i>J Biol Chem</i> 286: 27425-27435, 2011; Kuhn et al., <i>J Neurol Neurosurg Psychiatry</i> 2015 |
| Kir6.2 (KCNJ11)   | ATP-sensitive inwardly-rectifying $K^+$ channel. Channel activity is modified in hypokalemic Periodic Paralysis                                                                                                                                             | Tricarico et al., <i>J Clin Invest</i> 103: 675-682, 2001; Flagg et al., <i>Physiol Rev</i> 90: 799-829, 2010   |
